# Supplementary material for: Inhibition of Lipopolysaccharide-Induced Inflammatory Signaling by Soft Coral-Derived Prostaglandin A2 in RAW264.7 Cells
Source: MDPI journal article supplement (doi:10.3390/md20050316), 2022-05-09
Supplement: s1 [file s1]

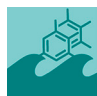

## Supplementary Materials for

### Inhibition of Lipopolysaccharide-Induced Inflammatory Signaling by Soft Coral-Derived Prostaglandin A<sub>2</sub> in RAW264.7 Cells

Osamu Ohno\*, Eika Mizuno, Junichiro Miyamoto, Tomoyuki Hoshina, Takuya Sano and Kenji Matsuno\*

*Department of Chemistry and Life Science, School of Advanced Engineering, Kogakuin University, 2665-1 Nakano, Hachioji, Tokyo 192-0015, Japan*

#### Table of Contents

|                                                                                                                                                           |   |
|-----------------------------------------------------------------------------------------------------------------------------------------------------------|---|
| Spectral data for PGA <sub>2</sub> isolated from the soft coral <i>Lobophytum</i> sp. ....                                                                | 2 |
| <b>Figure S1.</b> <sup>1</sup> H NMR spectrum of PGA <sub>2</sub> isolated from the soft coral <i>Lobophytum</i> sp. (400 MHz, CDCl <sub>3</sub> ). ....  | 2 |
| <b>Figure S2.</b> <sup>1</sup> H NMR spectrum of PGA <sub>2</sub> isolated from the soft coral <i>Lobophytum</i> sp. (400 MHz, CD <sub>3</sub> OD). ....  | 3 |
| <b>Figure S3.</b> <sup>13</sup> C NMR spectrum of PGA <sub>2</sub> isolated from the soft coral <i>Lobophytum</i> sp. (100 MHz, CD <sub>3</sub> OD). .... | 3 |
| <b>Figure S4.</b> Effects of 10 μM PGA <sub>2</sub> on LPS-induced degradation and resynthesis of IκBα. ....                                              | 4 |
| <b>Figure S5.</b> Effects of PMB on LPS-induced degradation of IκBα. ....                                                                                 | 4 |

**Spectral data for PGA<sub>2</sub> isolated from the soft coral *Lobophytum* sp.**

$[\alpha]_{D^{25}} = +1.82$  ( $c = 0.34$ , CH<sub>3</sub>OH), EIMS  $m/z$  334 [M]<sup>+</sup>, <sup>1</sup>H NMR (400 MHz, CDCl<sub>3</sub>)  $\delta_H$  7.50 (dd,  $J = 5.9, 2.3$  Hz, 1 H), 6.18 (dd,  $J = 5.4, 2.3$  Hz, 1 H), 5.62 (m, 1 H), 5.62 (m, 1 H), 5.43 (m, 1 H), 5.43 (m, 1 H), 4.13 (ddm,  $J = 12.5, 6.1$  Hz, 1 H), 3.26 (m, 1 H), 2.49 (m, 1 H), 2.36 (t,  $J = 7.3$  Hz, 2H), 2.33 (m, 1 H), 2.17 (m, 1 H), 2.13 (m, 2 H), 1.71 (tt,  $J = 7.3, 7.3$  Hz, 2 H), 1.53 (m, 2 H), 1.30 (m, 2 H), 1.30 (m, 2 H), 1.30 (m, 2 H), 0.89 (t,  $J = 6.8$  Hz, 3 H), <sup>1</sup>H NMR (400 MHz, CD<sub>3</sub>OD)  $\delta_H$  7.65 (dd,  $J = 5.4, 2.3$  Hz, 1 H), 6.17 (dd,  $J = 5.4, 1.8$  Hz, 1 H), 5.60 (m, 1 H), 5.60 (m, 1 H), 5.44 (m, 1 H), 5.39 (m, 1 H), 4.01 (ddd,  $J = 10.4, 6.3, 1.8$  Hz, 1 H), 3.31 (m, 1 H), 2.51 (m, 1 H), 2.29 (t,  $J = 8.6$  Hz, 2 H), 2.28 (m, 1H), 2.16 (m, 1 H), 2.13 (m, 2 H), 1.67 (m, 2 H), 1.49 (m, 2 H), 1.32 (m, 2 H), 1.32 (m, 2 H), 1.32 (m, 2 H), 0.91 (t,  $J = 6.8$  Hz, 3 H), <sup>13</sup>C NMR (100 MHz, CD<sub>3</sub>OD)  $\delta_C$  213.1, 178.0, 168.2, 136.6, 133.7, 132.3, 131.2, 127.8, 73.2, 53.4, 51.2, 38.3, 34.8, 33.0, 28.2, 27.7, 26.3, 26.2, 23.7, 14.4.

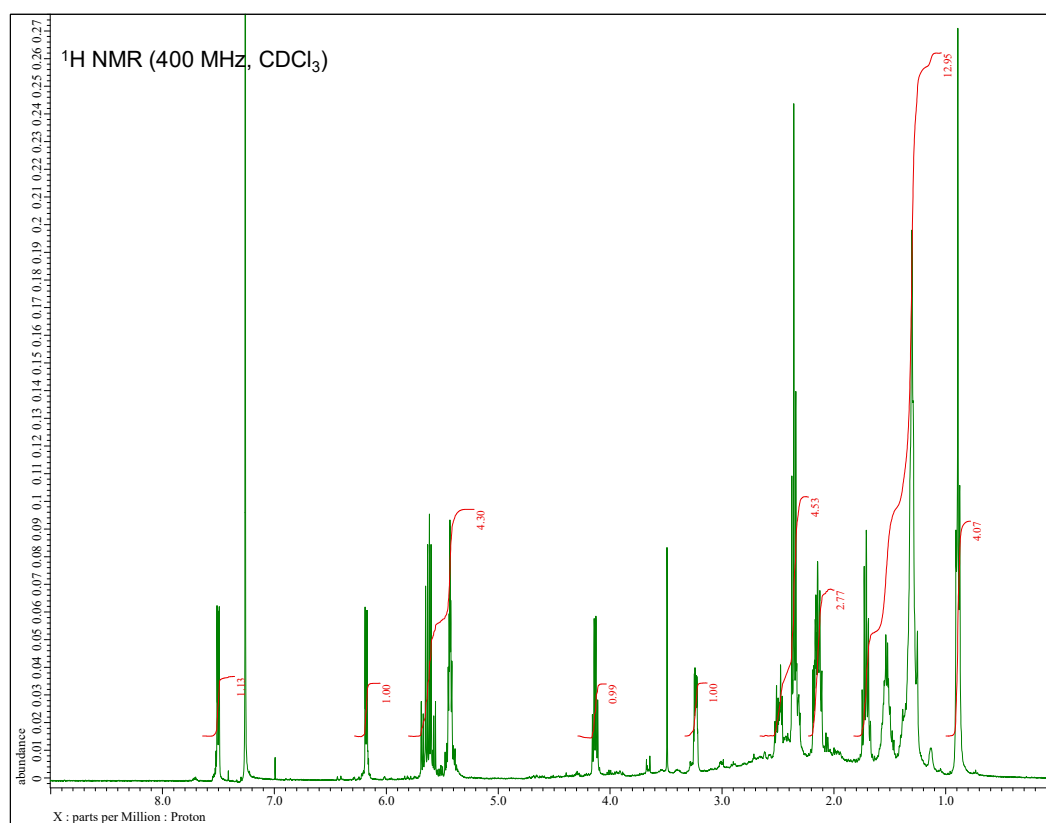

**Figure S1.** <sup>1</sup>H NMR spectrum of PGA<sub>2</sub> isolated from the soft coral *Lobophytum* sp. (400 MHz, CDCl<sub>3</sub>).

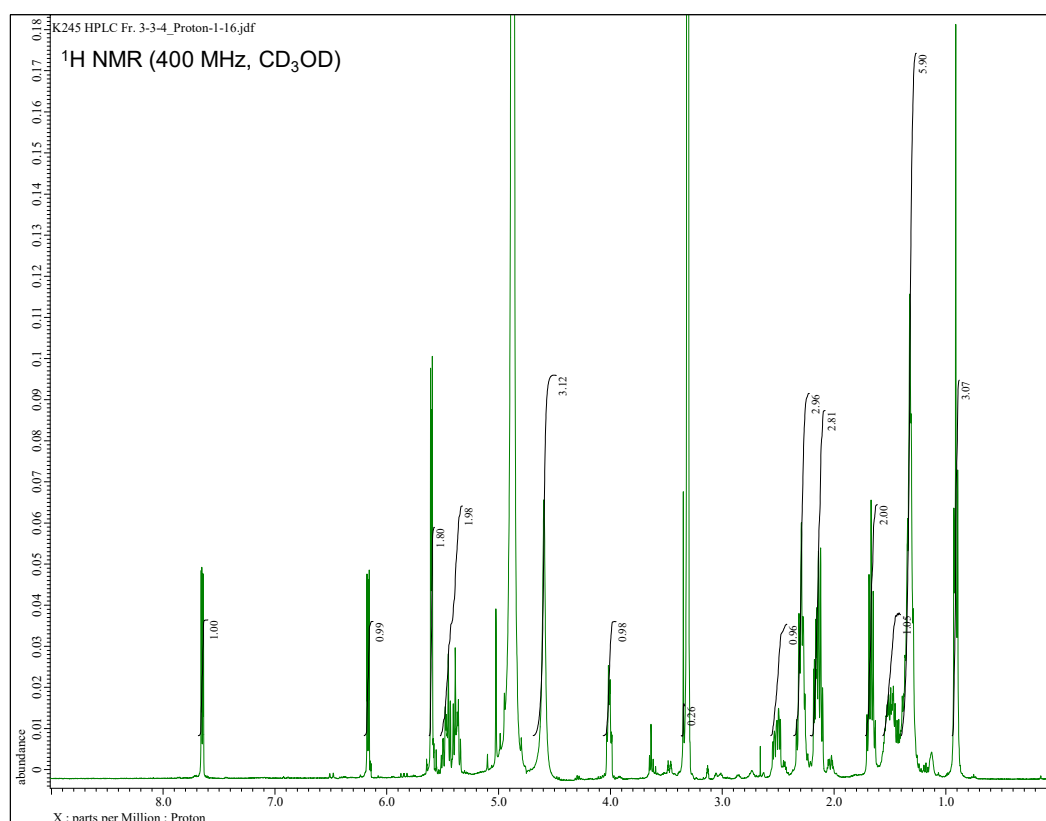

**Figure S2.** <sup>1</sup>H NMR spectrum of PGA<sub>2</sub> isolated from the soft coral *Lobophytum* sp. (400 MHz, CD<sub>3</sub>OD).

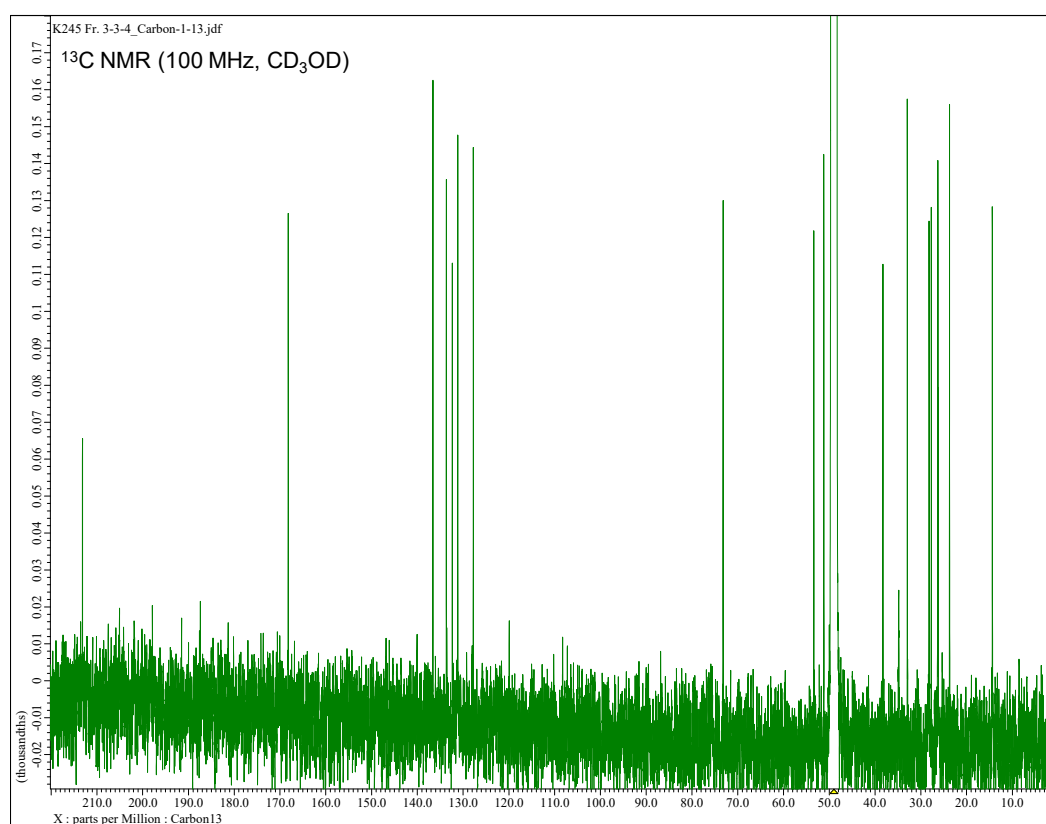

**Figure S3.** <sup>13</sup>C NMR spectrum of PGA<sub>2</sub> isolated from the soft coral *Lobophytum* sp. (100 MHz, CD<sub>3</sub>OD).

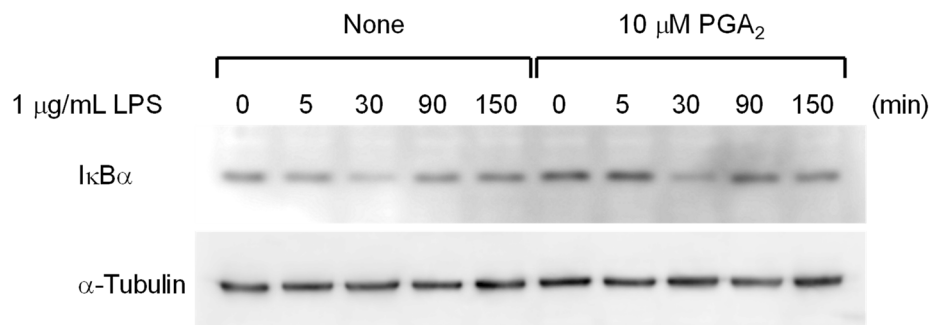

**Figure S4.** Effects of 10 μM PGA<sub>2</sub> on LPS-induced degradation and resynthesis of IκBα. RAW264.7 cells ( $1 \times 10^6$ ) were preincubated with or without 10 μM PGA<sub>2</sub> for 20 min, then treated with 1 μg/mL LPS for the indicated periods. The cell lysates were analyzed by western blotting with antibodies against IκBα and α-tubulin.

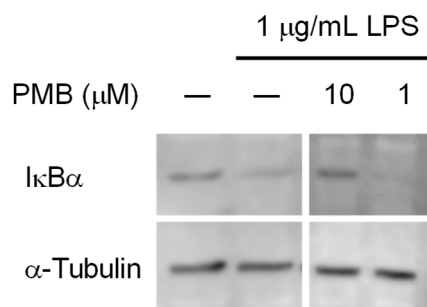

**Figure S5.** Effects of PMB on LPS-induced degradation of IκBα. RAW264.7 cells ( $1 \times 10^6$ ) were pretreated with the indicated concentrations of PMB at 20 min prior to exposure to 1 μg/mL LPS for 30 min. Then, the cell lysates were analyzed by western blotting with antibodies against IκBα and α-tubulin.
